# Supplementary material
Source: ML conference proceedings conference paper supplement (https://openaccess.thecvf.com/content/ICCV2023/html/Wang_StyleInV_A_Temporal_ICCV_2023_paper.html)
Supplement: Supplementary file 2 [file Wang_StyleInV_A_Temporal_ICCV_2023_supplemental.zip]

## Video repository

| Path                               | Description                                                                         |
|------------------------------------|-------------------------------------------------------------------------------------|
| video_samples                      | The folder where all single video files are saved.                                  |
| └ more_real-world_image_animation  | Animation + Style Transfer videos that are not included in the supplementary video. |
| └ one_minute                       | One-minute long videos generated by StyleInV.                                       |
| └ splitted_supplementary_video     | All single files that compose the supplementary video.                              |
| └└ main-experiments-16-frame       | 16-frame videos generated by baselines and ours.                                    |
| └└ main-experiments-128-frame      | 128-frame videos generated by baselines and ours.                                   |
| └└ finetuning-based-style-transfer | Finetuning-based style transfer, 128-frame videos.                                  |
| └└ real-world-image-animation      | Animation + Style Transfer videos, 128 frames.                                      |
| └└ more-examples                   | More 128-frame videos generated by our method.                                      |
